# Supplementary material for: Flexible SnO2 hollow nanosphere film based high-performance ultraviolet photodetector
Source: Royal Society of Chemistry journal article supplement (doi:10.1039/c3cc39273b), 2013-01-01
Supplement: c3cc39273b.pdf [file c3cc39273b.pdf]

## Electronic Supplementary Information

# Flexible SnO<sub>2</sub> Hollow Nanosphere Film Based High-Performance Ultraviolet Photodetector

Wei Tian,<sup>\*a,b</sup> Chao Zhang,<sup>a</sup> Tianyou Zhai,<sup>\*a</sup> Song-Lin Li,<sup>\*a</sup> Xi Wang,<sup>a</sup> Meiyong Liao,<sup>a</sup> Kazuhito Tsukagoshi,<sup>a</sup> Dmitri Golberg<sup>a</sup> and Yoshio Bando<sup>a,b</sup>

### Experimental

**Synthesis of SnO<sub>2</sub> hollow nanospheres:** In a typical synthesis of SnO<sub>2</sub> hollow nanospheres, 0.5 mL of concentrated hydrochloric acid (concentration: 36.5–38%) was added to ethanol/distilled water (volume ratio: 10:1). The mixture was stirred under ambient conditions for 10 min before 0.19 g of SnCl<sub>2</sub>·2H<sub>2</sub>O was added. Then the turbid precursor was ultrasonicated for 30 min. The resulting solution was transferred to a Teflon-lined stainless steel autoclave of 40 mL volume and kept at 200 °C for 24 h. The final products were centrifuged, rinsed with distilled water and ethanol several times to remove any impurities that remained in the final products.

**Materials Characterization.** X-ray powder diffraction (XRD) patterns were recorded on a Philips X'Pert PRO MPD X-ray diffractometer operated at 35 KV and 45 mA with Cu K $\alpha$  radiation. Transmission electron microscopy (TEM) images were obtained on a JEOL JEM-3000F transmission electron microscope with an accelerating voltage of 300 kV. FE-SEM analysis was carried out with a field-emission microscope (JSM-6700F) operated at an acceleration voltage of 10 kV.

**Device Fabrication and Characterization:** SnO<sub>2</sub> sphere film were self assembled at a “hexane-water” interface using the following procedure: 5 mg of SnO<sub>2</sub> hollow spheres were dispersed in 40 mL of distilled water by a magnetic stirring for 10 min. Hexane

(10 mL) was added to the vessel to produce a hexane-water interface. Next, 2.0 mL of ethanol was slowly added to the interface at a low rate by a syringe, and the SnO<sub>2</sub> hollow spheres were gradually trapped at the interface. Then most of the hexane at the top of the vessel was carefully removed by a syringe. Then the as-assembled film was transferred to a PET substrate by pulling the substrate out of the liquid phase at a slow speed. The SnO<sub>2</sub> sphere film was transported to an electric gun deposition system (ULVAC UEP-3000-2C), the Cr/Au (20nm /150 nm) electrodes were deposited using a shadow mask. The current–voltage (I–V) characteristics of the photodetectors were measured using an Agilent 4156C Semiconductor Parameter Analyzer. A spectroscopic response for different wavelengths was recorded using a 500 W Ushio xenon lamp with an illumination bandwidth of 2 nm, and an Acton Research monochromator with order sorting filters was used. A photocurrent was measured by fixing certain light wavelengths with adjustable light intensity. The light intensity was modulated through an aperture and calibrated by using a UV-enhanced Si photodiode. The time responses of photodetectors to light irradiation were measured by a current meter after shutting the UV-light.

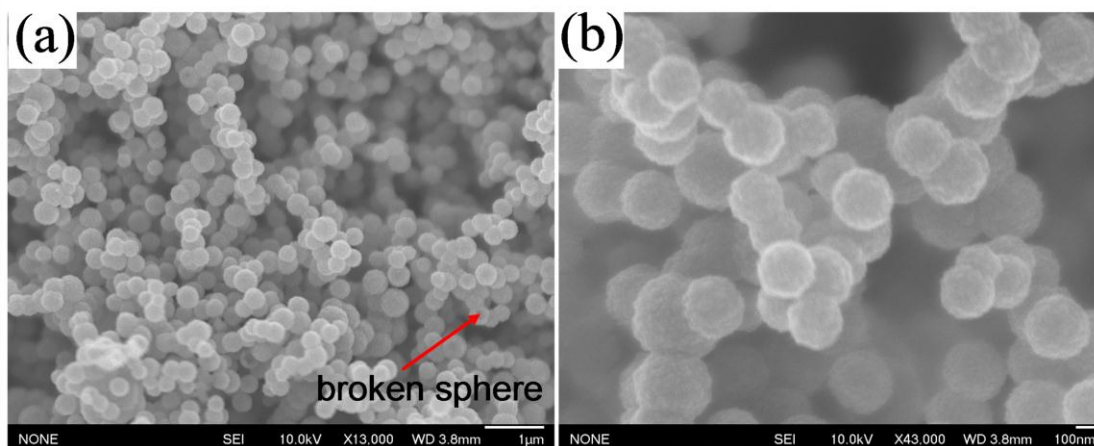

**Fig. S1** The magnified SEM images of SnO<sub>2</sub> spheres.

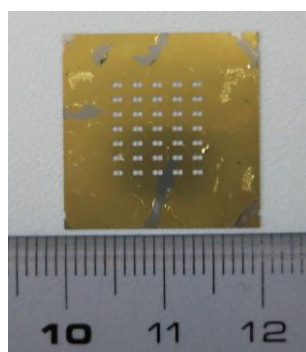

**Fig. S2** Photograph of shadow mask.

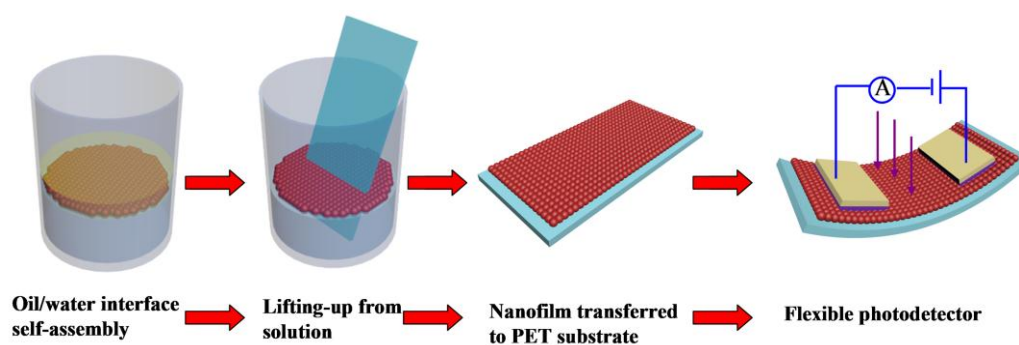

**Fig. S3** Schematic illustration of the fabrication procedure of flexible SnO<sub>2</sub> nanofilm photodetector.
